# Supplementary material for: Secondary growth of hierarchical nanostructures composed only of Nb3O7F single-crystalline nanorods as a new photocatalyst for hydrogen production
Source: Royal Society of Chemistry journal article supplement (doi:10.1039/c5ta02774h), 2015-01-01
Supplement: c5ta02774h1.pdf [file c5ta02774h1.pdf]

## **Secondary growth of hierarchical nanostructures composed only of Nb<sub>3</sub>O<sub>7</sub>F single-crystalline nanorods as a new photocatalyst for hydrogen production**

Junyuan Duan,<sup>\*ab</sup> Guangying Mou,<sup>a</sup> Shuai Zhang,<sup>b</sup> Sheng Wang<sup>b</sup> and Jianguo Guan<sup>\*a</sup>

<sup>a</sup>State Key Laboratory of Advanced Technology for Materials Synthesis and Processing, Wuhan University of Technology, 122 Luoshi Road, Wuhan 430070, China. Fax: 86 27 87218832; Tel: 86 27 87218832; E-mail: guanjg@whut.edu.cn

<sup>b</sup>Qinghai Provincial Key Laboratory of New Light Alloys, School of Mechanical Engineering, Qinghai University, 251 Ningda Road, Xining 810016, China. Fax: 86 971 5310440; Tel: 86 971 5168415; E-mail: junyuanduan@sina.com

**Supplementary table and images**

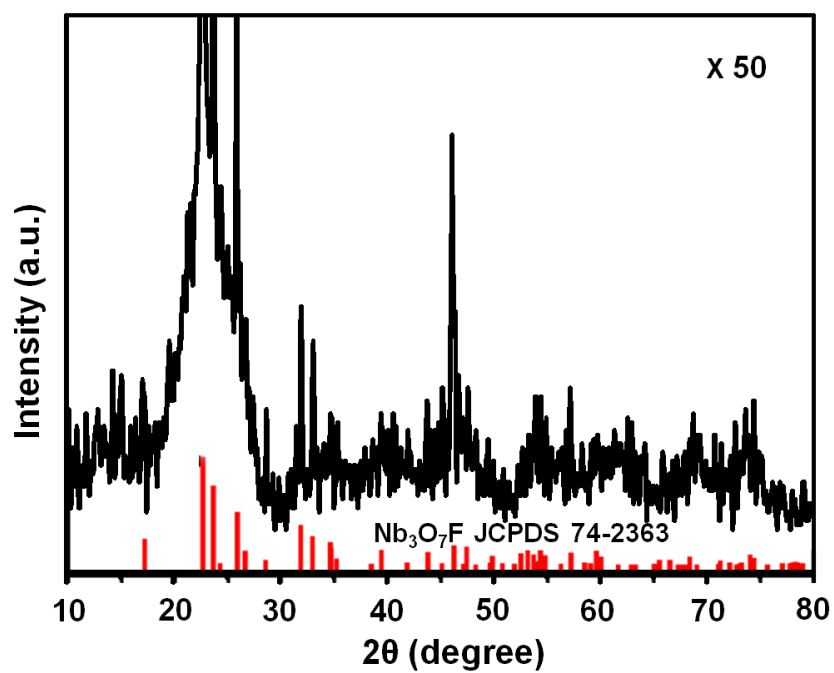

**Fig. S1** The enlarged XRD pattern of Fig. 1.

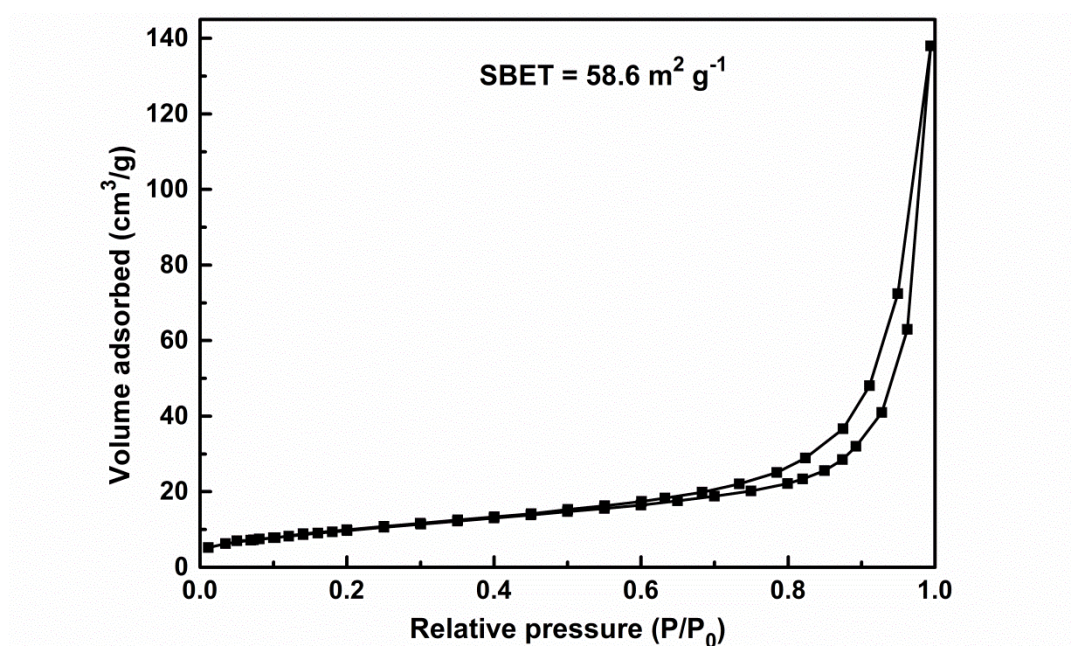

**Fig. S2** Nitrogen adsorption–desorption isotherm of Nb<sub>3</sub>O<sub>7</sub>F HNs. Fig. S2 shows that the type H3 hysteresis loop, which is assigned to the assembly of Nb<sub>3</sub>O<sub>7</sub>F single crystalline nanorods giving rise to slit-like pores.<sup>S1</sup> The shape of the hysteresis loop is the same as the Nb<sub>3</sub>O<sub>7</sub>F HNs reported in the literatures. The reported Nb<sub>3</sub>O<sub>7</sub>F HNs in the literatures were jointly consisted a large core in the central and nanorod in the external (Table S1). In contrast, our Nb<sub>3</sub>O<sub>7</sub>F HNs seems to be only consisted of nanorod units, and their nanorod units exhibit smaller diameters, giving the high specific surface area.

**Table S1** Comparisons of the building units and  $S_{\text{BET}}$  of various  $\text{Nb}_3\text{O}_7\text{F}$  samples

| Samples                             | Building units                                   | $S_{\text{BET}}$ ( $\text{m}^2 \text{g}^{-1}$ ) |
|-------------------------------------|--------------------------------------------------|-------------------------------------------------|
| $\text{Nb}_3\text{O}_7\text{F}$ HNs | Only Nanrods                                     | 58.6                                            |
| Reference 60                        | Solid core in central and nanorods in external   | 13.15                                           |
| Reference 61                        | Solid core in central and nanoplates in external | 35.7                                            |
| Reference 62                        | Solid core in central and nanorods in external   | /                                               |

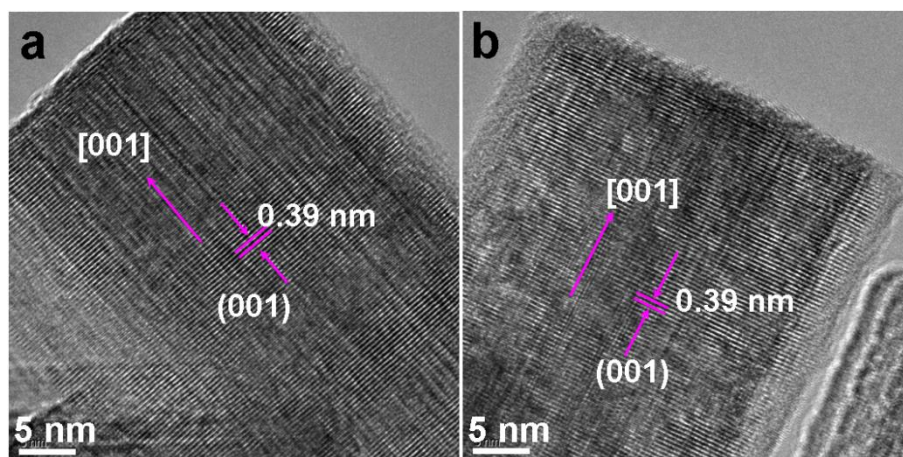

**Fig. S3** HRTEM images of two individual Nb<sub>3</sub>O<sub>7</sub>F nanorods.

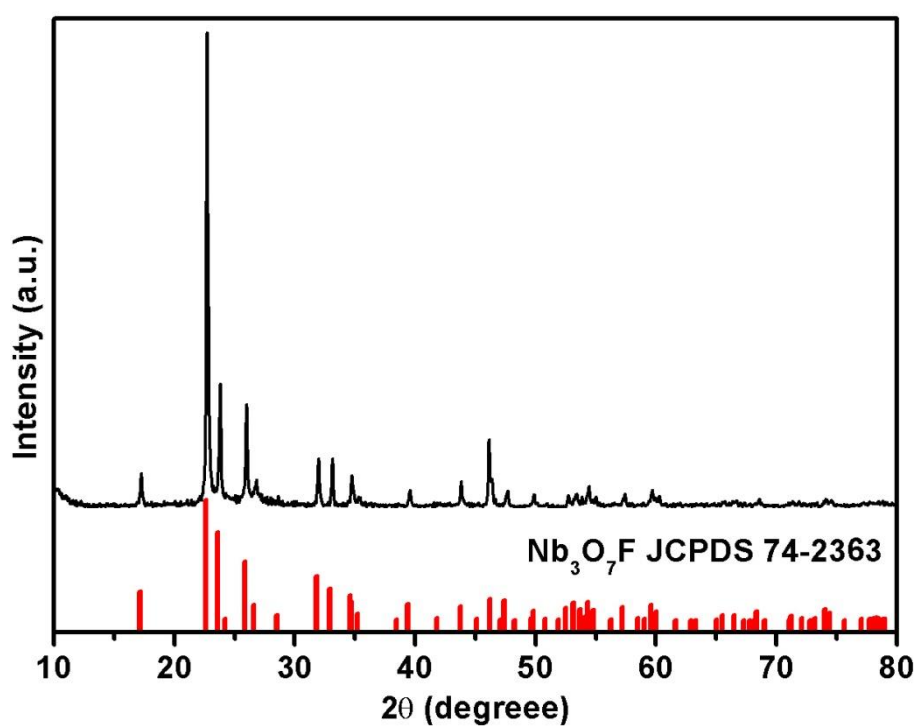

**Fig. S4** XRD pattern of the Nb<sub>3</sub>O<sub>7</sub>F NPs-HNs obtained at  $R = 30$  mL/27.5 mL.

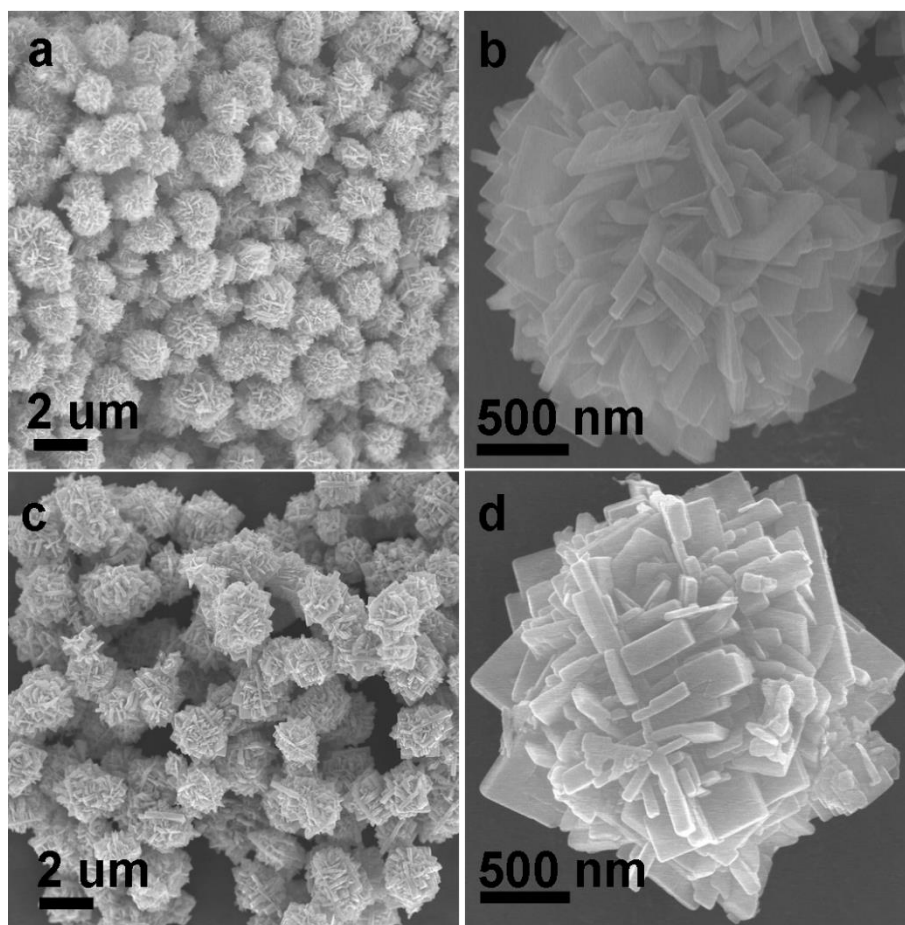

**Fig. S5** SEM images of the products obtained by changing  $T$  for the synthesis of  $\text{Nb}_3\text{O}_7\text{F}$  NPs-HNs to (a, b) 200 °C and (c, d) 250 °C.

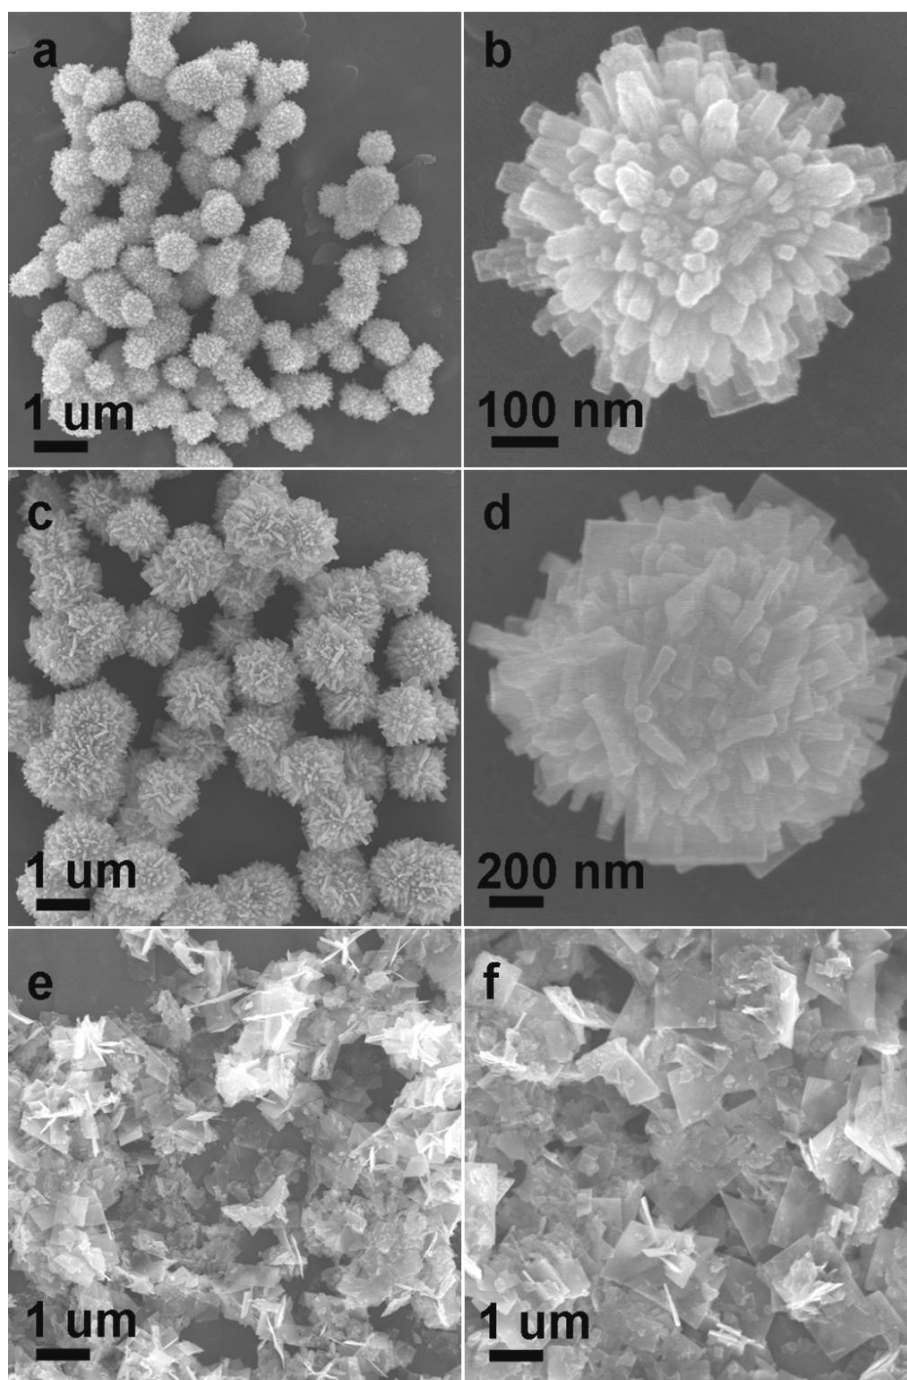

**Fig. S6** SEM images of the products obtained by changing  $[\text{H}_2\text{NbF}_7]$  for the synthesis of  $\text{Nb}_3\text{O}_7\text{F}$  NPs-HNs to (a, b) 1.30 mM, (c, d) 2.60 mM, (e) 7.80 mM and (f) 10.40 mM.

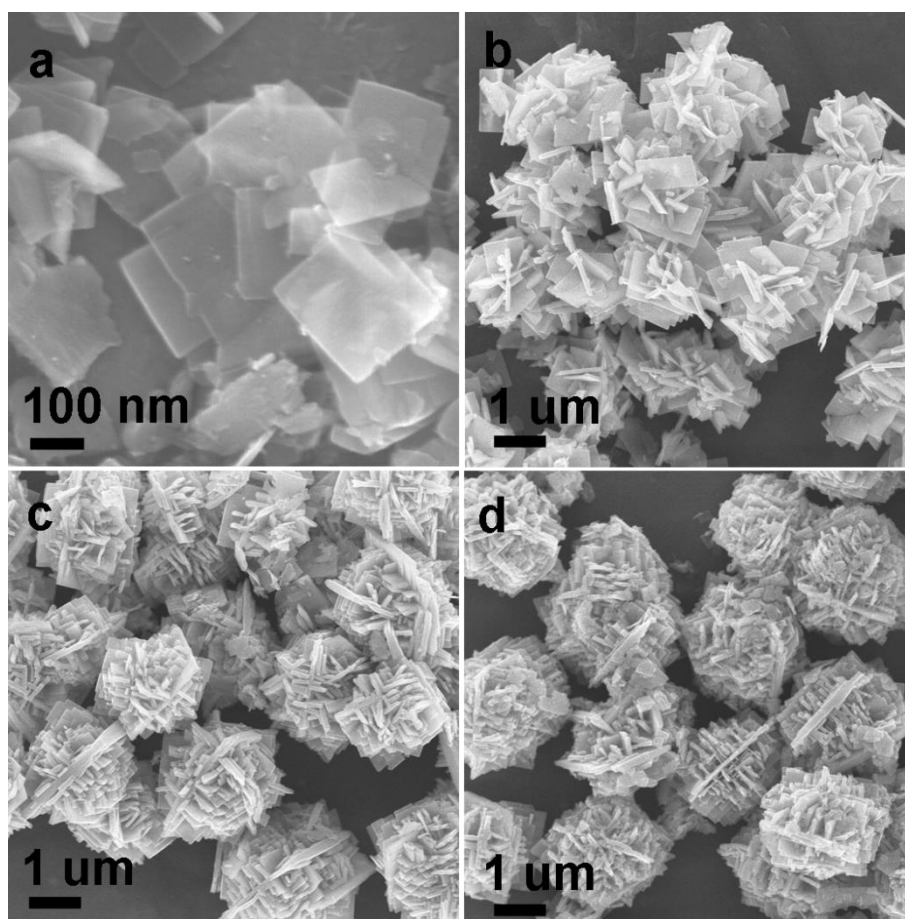

**Fig. S7** SEM images of the products obtained by changing  $t$  to (a) 1 h, (b) 2 h, (c) 6 h, (d) 12 h in the synthesis of Nb<sub>3</sub>O<sub>7</sub>F NPs-HNs.

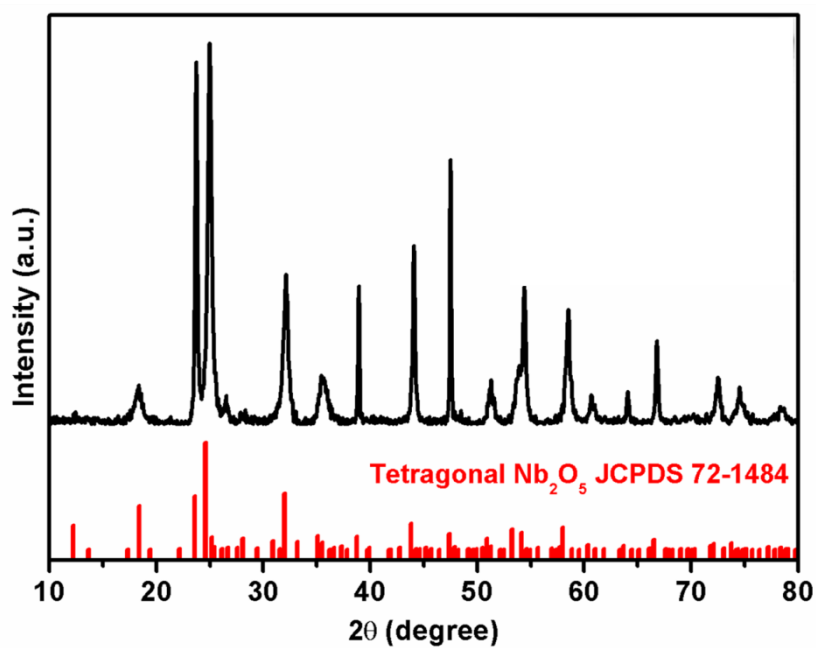

**Fig. S8** XRD pattern of the products obtained by calcining Nb<sub>3</sub>O<sub>7</sub>F HN at 800 °C in air atmosphere.

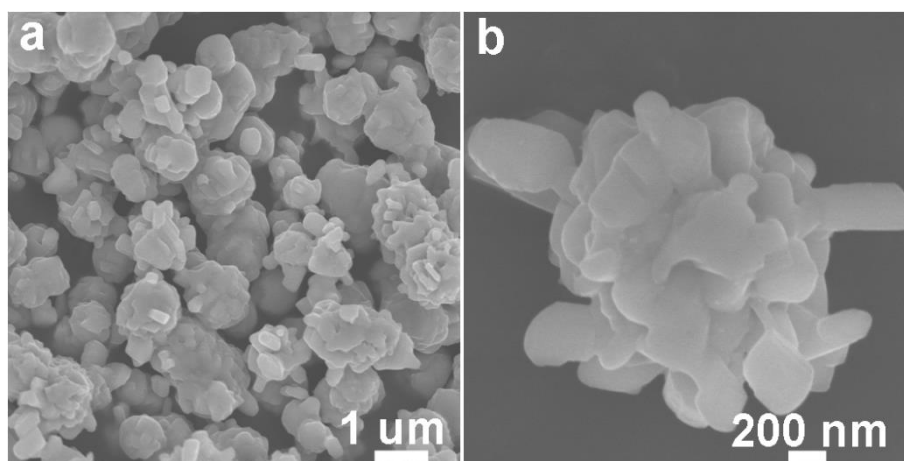

**Fig. S9** SEM images of the  $\text{Nb}_2\text{O}_5$  SPs obtained by calcining the typical  $\text{Nb}_3\text{O}_7\text{F}$  HNs.

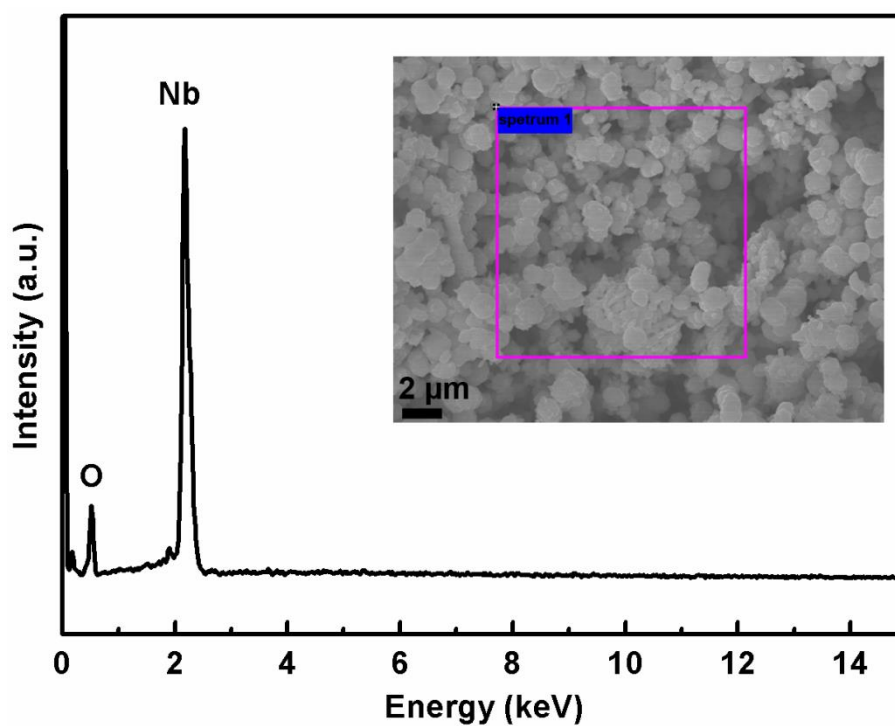

**Fig. S10** EDX spectrum of the  $\text{Nb}_2\text{O}_5$  SPs obtained by calcining the typical  $\text{Nb}_3\text{O}_7\text{F}$  HNs.

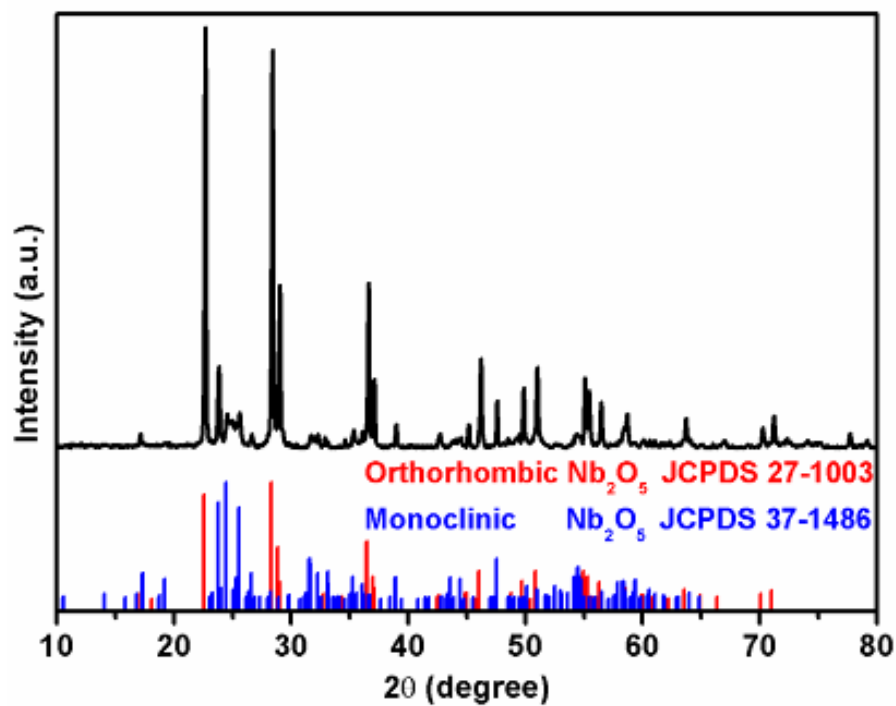

**Fig. S11** XRD pattern of C-Nb<sub>2</sub>O<sub>5</sub> samples.

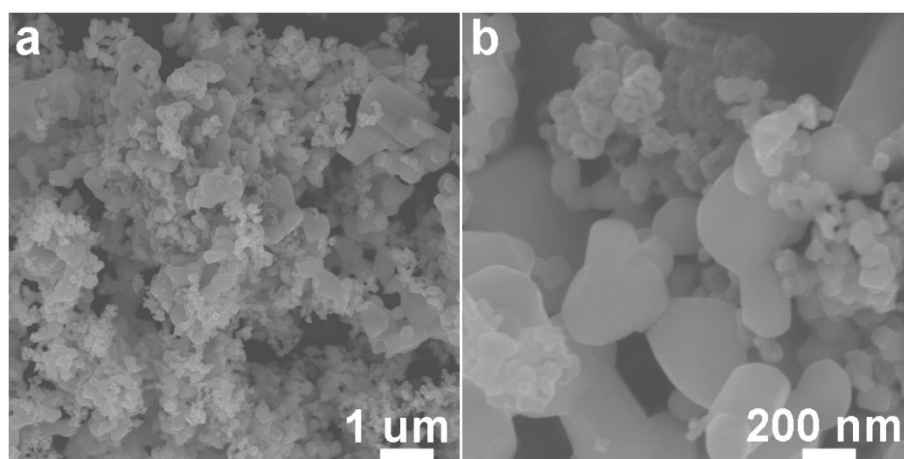

**Fig. S12** XRD pattern of C-Nb<sub>2</sub>O<sub>5</sub> samples.

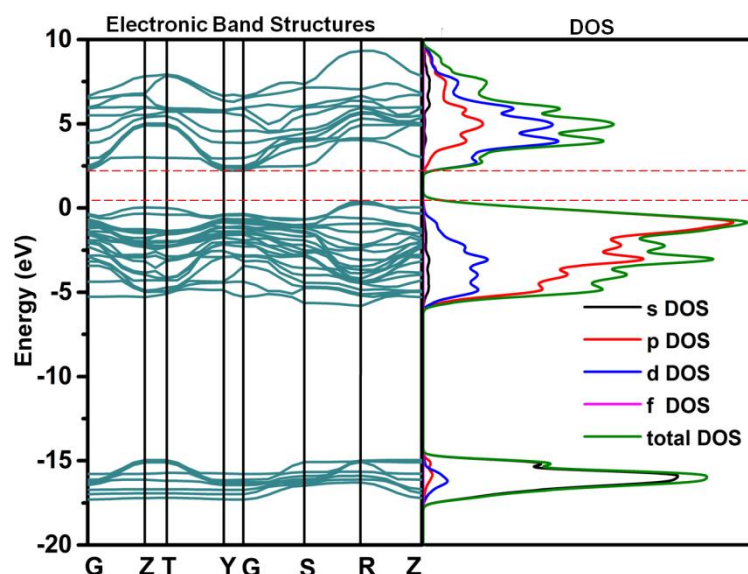

**Fig. S13** Calculated (left) electronic band structures and (right) densities of states (DOS) for the unit cell of Nb<sub>3</sub>O<sub>7</sub>F crystals.

### Calculation details

The electronic structures were calculated by using the density-functional theory-based CASTEP software package. The Perdew-Wang gradient-corrected functional for interactions between the valence electrons and ionic core and the generalized gradient approximation (GGA) were selected, and the energy cutoff was set to 340 eV.<sup>S2</sup> The ultrasoft pseudopotential and  $2 \times 2 \times 2$  k-point as a unit were used to calculate.<sup>S3</sup> The calculated unit cell parameters of orthorhombic Nb<sub>3</sub>O<sub>7</sub>F:  $a = 20.67$  Å,  $b = 3.83$  Å and  $c = 3.93$ . The geometry optimization was carried out by using the total energy with a tolerance of  $2 \times 10^{-5}$  eV, the forces of  $0.05$  eV Å<sup>-1</sup>, and the maximum atomic displacement of  $2 \times 10^{-3}$  Å.

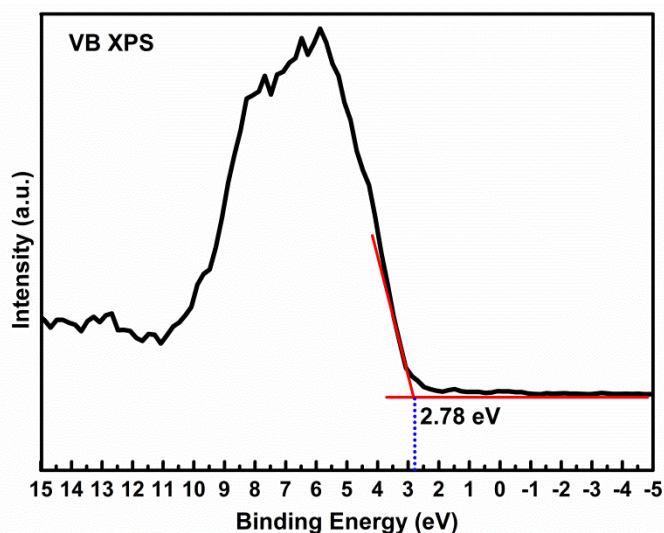

**Fig. S14** XPS valence band spectrum of the  $\text{Nb}_3\text{O}_7\text{F}$  HNs. The VBM was determined according to the method reported in references S4-5.

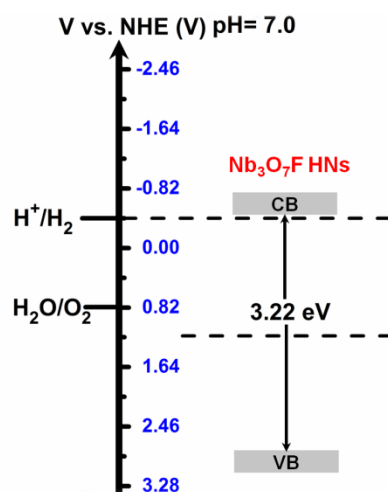

**Fig. S15** Band structure diagram for the  $\text{Nb}_3\text{O}_7\text{F}$  HNs dispersed in aqueous solutions at pH=7.0.

**Table S2** The BET surface areas ( $S_{\text{BET}}$ ) of various samples

| Samples                                 | $S_{\text{BET}}$ ( $\text{m}^2/\text{g}$ ) |
|-----------------------------------------|--------------------------------------------|
| $\text{Nb}_3\text{O}_7\text{F}$ HNs     | 58.6                                       |
| $\text{Nb}_2\text{O}_5$ SPs             | 2.9                                        |
| C- $\text{Nb}_2\text{O}_5$              | 4.7                                        |
| $\text{Nb}_3\text{O}_7\text{F}$ NPs-HNs | 31.6                                       |

## References

- S1 K. S. W. Sing, D. H. Everett, R. A. W. Haul, L. Moscou, R. A. Pierotti, J. Rouquerol and T. Siemieniewska, *Pure Appl. Chem.*, 1985, 57, 603.
- S2 J. P. Perdew, J. A. Chevary, S. H. Vosko, K. A. Jackson, M. R. Pederson, D. J. Singh and C. Fiolhais, *Phys. Rev. B: Condens. Matter*, 1992, 46, 6671.
- S3 H. J. Monkhorst and J. D. Pack, *Phys. Rev. B*, 1976, 13, 5188.
- S4 G. Liu, P. Niu, L. C. Yin and H. M. Cheng, *J. Am. Chem. Soc.* 2012, 134, 9070–9073.
- S5 X. B. Chen, L. Liu, P. Y. Yu and S.S.Mao. *Science*, 2011, 331,746-750.
